# Supplementary material for: The therapeutic potential and application of marine alkaloids in treating breast cancer
Source: Frontiers journal article supplement (doi:10.3389/fmars.2024.1440928), 2024-07-15
Supplement: Data_Sheet_1.DOCX [file Data_Sheet_1.DOCX]

***Supplementary Material***

**Supplementary Table 1 Alkaloids derived from marine tunicate against breast cancer.**

| Compound Name | Species Name | Cell Lines | IC50 | Mechanism | References |
| --- | --- | --- | --- | --- | --- |
| BrBIn | *Didemnum candidum* | MCF-7 | 10.0 ± 0.1 μM | Apoptosis | (Salucci et al., 2018) |
| Euseynstelamide B | MDA-MB- 231 | 5 μM | G2 cell cycle arrest; topoisomerase II poison | (Liberio et al., 2015) |
| Granulatimide | *Didemnum granulatum* | p53- MCF-7 | 1–1.8 μM | G2 cell cycle checkpoint inhibitors | (Berlinck et al., 1998) |
| Isogranulatimide | p53- MCF-7 |
| Mollamide B | *Didemnum molle* | MCF-7 | 100 µM (Inhibition: 56%) | Cytotoxicity | (Donia et al., 2008) |
| Fascaplysin A | *Didemnum* sp. | BT-549 | 5.1 μM | Cytotoxicity | (Segraves et al., 2004) |
| 3-Bromofascaplysin | HS 578T | 0.59 μM |
| BT-549 | 0.59 μM |
| T-47D | >5 μM |
| Lissoclibadin 1 | *Lissoclinum cf. badium* | T-47D | 0.39 μM | Cytotoxicity; apoptosis | (Oda et al., 2007) |
| MDA-MB-231 | 0.3 μM |
| MCF-7 | 7.6 ± 4.0 μM | Cytotoxicity | (Tatsuta et al., 2017) |
| Lissoclibadin 2 | T-47D | 0.57 μM | (Oda et al., 2007) |
| MDA-MB-231 | 0.2 μM |
| Lissoclibadin 3 | T-47D | 3.18 μM |
| MDA-MB-231 | 3.59 μM |
| Lissoclibadin 8 | MCF-7 | 11.8 ± 3.1 μM | (Tatsuta et al., 2017) |
| Lissoclibadin 14 | MCF-7 | 6.4 ± 2.7 μM |
| Lissoclinotoxin F | T-47D | 1.04 μM | (Oda et al., 2007) |
| MDA-MB-231 | 0.69 μM |
| MDA-MB-468 | 1.5 μg/mL | (Davis et al., 2003) |
| Lissoclinotoxin E | MDA-MB-468 | 2.3 μg/mL |
| 3,4-dimethoxy-6-(2'-N,N-dimethylaminoethyl)-5-(methylthio)benzotrithiane | T-47D | 3.39 μM | (Oda et al., 2007) |
| MDA-MB-231 | 5.34 μM |
| N,N-dimethyl-5-(methylthio)varacin | T-47D | 2.3 μM |
| MDA-MB-231 | 3.65 μM |
| Trabectedin | *Ecteinascidia turbinata* | MX-1 | 0.1 nM | Cytotoxicity | (Takahashi et al., 2002) |
| MCF-7 | 1.5 nM |
| MCF-7/DXR | 3.7 nM |
| MDA-MB-453 | 2.5 ± 0.24 nM | Apoptosis | (Atmaca et al., 2013) |
| MCF-10A | 95 nM | Cytotoxicity |
| Aplicyanin B | *Aplidium lobatum* | MDA-MB-231 | GI50: 0.42 μM | Anti-mitotic | (Reyes et al., 2008b) |
| Aplicyanin D | GI50: 0.41 μM |
| Aplicyanin E | GI50: 7.96 μM | Cytotoxicity |
| Aplicyanin F | GI50: 0.81 μM | Antimitotic |
| Botryllamide K | *Aplidium altarium* | MCF-7 | 74 μM | Cytotoxicity | (Yin et al., 2010b) |
| Botryllamide L | 91 μM |
| Caelestine A | *Aplidium caelestis* | MCF-7 | 39 μM | Cytotoxicity | (Yin et al., 2010a) |
| Caelestine B | 49 μM |
| Caelestine C | 40 μM |
| Caelestine D | 38 μM |
| UCN-01 | *Eudistoma* sp*.* | MDA-MB-231 | 1.55 μM | Apoptosis | (Lee et al., 1999) |
| T-47D | 1.7 μM |
| MCF-7 | < 0.15 μg /mL |
| Ascididemin | *Cystodytes dellechiajei* | MCF7 | Induce: 65% ± 5.8% apoptotic | Apoptosis; topoisomerase II inhibitor | (Morvan, 2013) |
| 7-oxo-3,8,9-trihydroxystaurosporine | *Cystodytes solitus* | MDA-MB-231 | GI50: 28.4 nM | Cytotoxicity | (Reyes et al., 2008a) |
| 7-Oxo-8,9-dihydroxy-4′-N-demethylstaurosporine | GI50: 32.1 nM |
| Arnoamine A | *Cystodytes* sp. | MCF-7 | GI50: 0.3 μg/mL | Cytotoxicity | (Plubrukarn and Davidson, 1998) |
| Arnoamine B | GI50: 2-3 μg/mL |
| Botryllamide G | *Botryllus tyreus* | Breast cancer carcinoma | 6.9 μM | Cytotoxicity | (Palanisamy et al., 2017) |
| Botryllamide E | 27 μM |
| Botryllamide F | 41 μM |
| 3,6-Dibromoindole | *Distaplia skoogi* | MDA-MB-231 | 117.72 μM | Cytotoxicity | (Palanisamy et al., 2017) |
| 6-Bromo-3-chloroindole | 72.53 μM |
| 6-Bromo-2-oxindole | 74.41 μM |
| Tanjungide A | *Diazona cf formosa.* | MDA-MB-231 | GI50: 0.23 μM | Cytotoxicity | (Murcia et al., 2014) |
| Tanjungide B | GI50: 1.63 μM |
| Lamellarin D | *Lamellaria* sp. | MDA-MB-231 | GI50: 0.25 μM | Inhibit topoisomerase I; apoptosis; DNA damage; early disruption of MTP | (Pla et al., 2006) |

**Supplementary Table 2 Marine bryozoa and other derived alkaloids against breast cancer.**

| Compound Name | Species Name | Cell Lines | IC50 | Mechanism | References |
| --- | --- | --- | --- | --- | --- |
| Pterocellin A | *Pterocella vesiculosa* | MCF-7 | GI50: 1.5 μM | Cytotoxicity | (Pejin et al., 2014) |
| NCI/ADR-RES | GI50: 2.1 µM |
| MDA-MB-231 | GI50: 2.6 μM |
| HS-578T | GI50: 6.3 μM |
| MDA-MB-435 | GI50: 0.2 μM |
| MDA-N | GI50: 0.2 μM |
| BT-549 | GI50: 1.7 μM |
| MID | GI50: 1.4 μM |
| T-47D | GI50: 1.8 μM |
| Pterocellin B | MCF-7 | GI50: 1 μM |
| NCI/ADR-RES | GI50: 1.4 µM |
| MDA-MB-231 | GI50: 3.3 μM |
| HS-578T | GI50: 5.1 μM |
| MDA-MB-435 | GI50: 0.2 μM |
| MDA-N | GI50: 0.2 μM |
| BT-549 | GI50: 1.5 μM |
| MID | GI50: 0.7 μM |
| T-47D | GI50: 1.3 μM |
| Securidine A | *Securiflustra securifrons* | MCF-7 | / | / | (Michael et al., 2017) |
| Securamine H | 2.1 ± 0.1 μM | Cytotoxicity | (Hansen et al., 2017) |
| Securamine I | 2.4 ± 0.2 μM |
| Securamine J | >50 μM | / |
| Securamine C | 23 ± 1 μM | Cytotoxicity |
| Securamine E | 8.5 ± 0.2 μM |
| C. zavjalovensis | *Cryptosula zavjalovensis Kubanin* | MCF-7 | 8 μg/ml（EtOAc extract） | Cytotoxicity | (Gonzaga et al., 2021) |
| Tambjamine K | *Tambja ceutae* | MB-231 | 15.3 μM | Cytotoxicity | (Aldrich et al., 2010) |

Aldrich, L.N., Stoops, S.L., Crews, B.C., Marnett, L.J., and Lindsley, C.W. (2010). Total synthesis and biological evaluation of tambjamine K and a library of unnatural analogs. *Bioorganic & Medicinal Chemistry Letters* 20(17)**,** 5207-5211. doi: <https://doi.org/10.1016/j.bmcl.2010.06.154>.

Atmaca, H., Bozkurt, E., Uzunoglu, S., Uslu, R., and Karaca, B. (2013). A diverse induction of apoptosis by trabectedin in MCF-7 (HER2-/ER+) and MDA-MB-453 (HER2+/ER-) breast cancer cells. *Toxicol Lett* 221(2)**,** 128-136. doi: 10.1016/j.toxlet.2013.06.213.

Berlinck, R.G.S., Britton, R., Piers, E., Lim, L., Roberge, M., Moreira da Rocha, R., and Andersen, R.J. (1998). Granulatimide and Isogranulatimide, Aromatic Alkaloids with G2 Checkpoint Inhibition Activity Isolated from the Brazilian Ascidian Didemnum granulatum:  Structure Elucidation and Synthesis. *The Journal of Organic Chemistry* 63(26)**,** 9850-9856. doi: 10.1021/jo981607p.

Davis, R.A., Sandoval, I.T., Concepcion, G.P., Moreira da Rocha, R., and Ireland, C.M. (2003). Lissoclinotoxins E and F, novel cytotoxic alkaloids from a Philippine didemnid ascidian. *Tetrahedron* 59(16)**,** 2855-2859. doi: <https://doi.org/10.1016/S0040-4020(03)00335-1>.

Donia, M.S., Wang, B., Dunbar, D.C., Desai, P.V., Patny, A., Avery, M., and Hamann, M.T. (2008). Mollamides B and C, Cyclic hexapeptides from the indonesian tunicate Didemnum molle. *J Nat Prod* 71(6)**,** 941-945. doi: 10.1021/np700718p.

Gonzaga, L.J., Cavaco, I., and Fortunato, H. (2021). CYTOTOXICITY OF CRYPTOSULA ZAVJALOVENSIS KUBANIN EXTRACT AGAINST BREAST CANCER CELL LINE MCF7. *Acta Poloniae Pharmaceutica* 78. doi: 10.32383/appdr/139634.

Hansen, K., Isaksson, J., Bayer, A., Johansen, J.A., Andersen, J.H., and Hansen, E. (2017). Securamine Derivatives from the Arctic Bryozoan Securiflustra securifrons. *J Nat Prod* 80(12)**,** 3276-3283. doi: 10.1021/acs.jnatprod.7b00703.

Lee, S.I., Brown, M.K., and Eastman, A. (1999). Comparison of the efficacy of 7-hydroxystaurosporine (UCN-01) and other staurosporine analogs to abrogate cisplatin-induced cell cycle arrest in human breast cancer cell lines. *Biochem Pharmacol* 58(11)**,** 1713-1721. doi: 10.1016/s0006-2952(99)00258-0.

Liberio, M.S., Sadowski, M.C., Davis, R.A., Rockstroh, A., Vasireddy, R., Lehman, M.L., and Nelson, C.C. (2015). The ascidian natural product eusynstyelamide B is a novel topoisomerase II poison that induces DNA damage and growth arrest in prostate and breast cancer cells. *Oncotarget* 6(41)**,** 43944-43963. doi: 10.18632/oncotarget.6267.

Michael, P., Hansen, K., Isaksson, J., Andersen, J.H., and Hansen, E. (2017). A Novel Brominated Alkaloid Securidine A, Isolated from the Marine Bryozoan Securiflustra securifrons. *Molecules* 22(7). doi: 10.3390/molecules22071236.

Morvan, D. (2013). Functional metabolomics uncovers metabolic alterations associated to severe oxidative stress in MCF7 breast cancer cells exposed to ascididemin. *Mar Drugs* 11(10)**,** 3846-3860. doi: 10.3390/md11103846.

Murcia, C., Coello, L., Fernández, R., Martín, M.J., Reyes, F., Francesch, A., et al. (2014). Tanjungides A and B: new antitumoral bromoindole derived compounds from Diazona cf formosa. isolation and total synthesis. *Mar Drugs* 12(2)**,** 1116-1130. doi: 10.3390/md12021116.

Oda, T., Kamoshita, K., Maruyama, S., Masuda, K., Nishimoto, M., Xu, J., et al. (2007). Cytotoxicity of Lissoclibadins and Lissoclinotoxins, Isolated from a Tropical Ascidian <i>Lissoclinum</i> cf. <i>badium</i>, against Human Solid-Tumor-Derived Cell Lines. *Biological and Pharmaceutical Bulletin* 30(2)**,** 385-387. doi: 10.1248/bpb.30.385.

Palanisamy, S.K., Rajendran, N.M., and Marino, A. (2017). Natural Products Diversity of Marine Ascidians (Tunicates; Ascidiacea) and Successful Drugs in Clinical Development. *Nat Prod Bioprospect* 7(1)**,** 1-111. doi: 10.1007/s13659-016-0115-5.

Pejin, B., Mojović, M.D., and Savić, A. (Year). "Novel antitumour natural products from the phylum Bryozoa").

Pla, D., Marchal, A., Olsen, C.A., Francesch, A., Cuevas, C., Albericio, F., and Alvarez, M. (2006). Synthesis and structure-activity relationship study of potent cytotoxic analogues of the marine alkaloid Lamellarin D. *J Med Chem* 49(11)**,** 3257-3268. doi: 10.1021/jm0602458.

Plubrukarn, A., and Davidson, B.S. (1998). Arnoamines A and B, New Cytotoxic Pentacyclic Pyridoacridine Alkaloids from the Ascidian Cystodytes sp. *The Journal of Organic Chemistry* 63(5)**,** 1657-1659. doi: 10.1021/jo9719721.

Reyes, F., Fernández, R., Rodríguez, A., Bueno, S., de Eguilior, C., Francesch, A., and Cuevas, C. (2008a). Cytotoxic staurosporines from the marine ascidian Cystodytes solitus. *J Nat Prod* 71(6)**,** 1046-1048. doi: 10.1021/np700748h.

Reyes, F., Fernández, R., Rodríguez, A., Francesch, A., Taboada, S., Ávila, C., and Cuevas, C. (2008b). Aplicyanins A–F, new cytotoxic bromoindole derivatives from the marine tunicate Aplidium cyaneum. *Tetrahedron* 64(22)**,** 5119-5123. doi: <https://doi.org/10.1016/j.tet.2008.03.060>.

Salucci, S., Burattini, S., Buontempo, F., Orsini, E., Furiassi, L., Mari, M., et al. (2018). Marine bisindole alkaloid: A potential apoptotic inducer in human cancer cells. *Eur J Histochem* 62(2)**,** 2881. doi: 10.4081/ejh.2018.2881.

Segraves, N.L., Robinson, S.J., Garcia, D., Said, S.A., Fu, X., Schmitz, F.J., et al. (2004). Comparison of Fascaplysin and Related Alkaloids:  A Study of Structures, Cytotoxicities, and Sources. *Journal of Natural Products* 67(5)**,** 783-792. doi: 10.1021/np049935+.

Takahashi, N., Li, W., Banerjee, D., Guan, Y., Wada-Takahashi, Y., Brennan, M.F., et al. (2002). Sequence-dependent synergistic cytotoxicity of ecteinascidin-743 and paclitaxel in human breast cancer cell lines in vitro and in vivo. *Cancer Res* 62(23)**,** 6909-6915.

Tatsuta, T., Hosono, M., Rotinsulu, H., Wewengkang, D.S., Sumilat, D.A., Namikoshi, M., and Yamazaki, H. (2017). Lissoclibadin 1, a Polysulfur Aromatic Alkaloid from the Indonesian Ascidian Lissoclinum cf. badium, Induces Caspase-Dependent Apoptosis in Human Colon Cancer Cells and Suppresses Tumor Growth in Nude Mice. *J Nat Prod* 80(2)**,** 499-502. doi: 10.1021/acs.jnatprod.6b01051.

Yin, S., Boyle, G.M., Carroll, A.R., Kotiw, M., Dearnaley, J., Quinn, R.J., and Davis, R.A. (2010a). Caelestines A-D, brominated quinolinecarboxylic acids from the Australian ascidian Aplidium caelestis. *J Nat Prod* 73(9)**,** 1586-1589. doi: 10.1021/np100329w.

Yin, S., Cullinane, C., Carroll, A.R., Quinn, R.J., and Davis, R.A. (2010b). Botryllamides K and L, new tyrosine derivatives from the Australian ascidian Aplidium altarium. *Tetrahedron Letters* 51(26)**,** 3403-3405. doi: <https://doi.org/10.1016/j.tetlet.2010.04.104>.
